# Supplementary material for: Metabonomic analysis of the therapeutic effect of Potentilla discolor in the treatment of type 2 diabetes mellitus
Source: Royal Society of Chemistry journal article supplement (doi:10.1039/c4mb00278d), 2014-07-29
Supplement: c4mb00278d1.pdf [file c4mb00278d1.pdf]

## Supplementary information

**Table S1.** Stability and repeatability of UPLC-Q/TOF MS method validation using QC sample

| NO       | RT<br>(min) | <i>m/z</i> | Stability                |                               |                      | Repeatability            |                               |                      |
|----------|-------------|------------|--------------------------|-------------------------------|----------------------|--------------------------|-------------------------------|----------------------|
|          |             |            | RSD<br>(%) <sub>RT</sub> | RSD (%) <sub><i>m/z</i></sub> | RSD (%) <sub>p</sub> | RSD<br>(%) <sub>RT</sub> | RSD (%) <sub><i>m/z</i></sub> | RSD (%) <sub>p</sub> |
| 1 (ESI-) | 1.22        | 283.0669   | 0.4428                   | 0.0018                        | 10.8532              | 0.6547                   | 0.0036                        | 11.3818              |
| 2 (ESI-) | 7.64        | 514.2836   | 0.0106                   | 0.0016                        | 5.8795               | 0.5474                   | 0.0034                        | 6.8646               |
| 3 (ESI-) | 13.82       | 319.2262   | 0.7601                   | 0.0033                        | 11.8316              | 0.6854                   | 0.0045                        | 13.0684              |
| 4 (ESI+) | 1.97        | 167.0938   | 0.4353                   | 0.0015                        | 12.8432              | 0.0470                   | 0.0021                        | 7.8945               |
| 5 (ESI+) | 3.76        | 206.1063   | 0.8476                   | 0.0012                        | 5.6983               | 0.8092                   | 0.0035                        | 12.1545              |
| 6 (ESI+) | 11.74       | 468.3088   | 0.0243                   | 0.0029                        | 11.3403              | 0.7631                   | 0.0033                        | 11.1542              |

The RSD (%)<sub>RT</sub>, RSD (%)<sub>*m/z*</sub> and RSD (%)<sub>p</sub> values representing for the RSD of retention time, *m/z* and peak areas of the selected ions based on UPLC-Q/TOF MS method.

**Table S2 Identification of significantly differential metabolites in the mice plasma and their related pathways.**

| VIP  | m/z       | Quasi-molecular ion | Formula                                                                         | Error (ppm) | Metabolite             | Model trend <sup>a</sup> | Treatment trend <sup>b</sup> CA | Treatment trend <sup>b</sup> EPD | Related pathway                                                     |
|------|-----------|---------------------|---------------------------------------------------------------------------------|-------------|------------------------|--------------------------|---------------------------------|----------------------------------|---------------------------------------------------------------------|
| 1.39 | 1028.2610 | [M-H] <sup>-</sup>  | C <sub>37</sub> H <sub>58</sub> N <sub>7</sub> O <sub>19</sub> P <sub>3</sub> S | -3.1        | 3-Oxo-OPC6-CoA         | (*)↓                     | (*)↑                            | (*)↑                             | alpha-Linolenic acid metabolism                                     |
| 1.19 | 674.5101  | [M-H] <sup>-</sup>  | C <sub>37</sub> H <sub>74</sub> NO <sub>7</sub> P                               | -3.5        | PE(14:0/P-18:0)        | (*)↓                     | (*)↑                            | (*)↑                             | Glycerophospholipid metabolism                                      |
| 1.03 | 179.0448  | [M-H] <sup>-</sup>  | C <sub>8</sub> H <sub>8</sub> N <sub>2</sub> O <sub>3</sub>                     | -4.4        | Nicotinuric acid       | (*)↑                     | (*)↓                            | (*)↓                             | Nicotinate and nicotinamide metabolism                              |
| 1.33 | 611.1434  | [M-H] <sup>-</sup>  | C <sub>20</sub> H <sub>32</sub> N <sub>6</sub> O <sub>12</sub> S <sub>2</sub>   | -1.1        | Glutathione, oxidized  | (*)↑                     | (#)↓                            | (*)↓                             | Glutathione metabolism                                              |
| 1.12 | 135.0305  | [M-H] <sup>-</sup>  | C <sub>5</sub> H <sub>4</sub> N <sub>4</sub> O                                  | 3.7         | Hypoxanthine           | (*)↑                     | (*)↓                            | (*)↓                             | Purine metabolism                                                   |
| 1.54 | 211.9969  | [M-H] <sup>-</sup>  | C <sub>4</sub> H <sub>8</sub> NO <sub>7</sub> P                                 | 4.7         | 4-Phospho-L-aspartate  | (*)↑                     | (*)↓                            | (*)↓                             | Glycine, serine and threonine metabolism                            |
| 1.57 | 252.0740  | [M-H] <sup>-</sup>  | C <sub>9</sub> H <sub>11</sub> N <sub>5</sub> O <sub>4</sub>                    | 3.2         | D-(+)-Neopterin        | (*)↑                     | (*)↓                            | (*)↓                             | Folate biosynthesis                                                 |
| 1.52 | 283.0669  | [M-H] <sup>-</sup>  | C <sub>10</sub> H <sub>12</sub> N <sub>4</sub> O <sub>6</sub>                   | -3.2        | Xanthosine             | (*)↓                     | (*)↑                            | (*)↑                             | Purine metabolism;                                                  |
| 1.37 | 322.0436  | [M-H] <sup>-</sup>  | C <sub>9</sub> H <sub>14</sub> N <sub>3</sub> O <sub>8</sub> P                  | -1.1        | 5'-CMP                 | (*)↓                     | (*)↑                            | (*)↑                             | Pyrimidine metabolism                                               |
| 1.50 | 514.2836  | [M-H] <sup>-</sup>  | C <sub>26</sub> H <sub>45</sub> NO <sub>7</sub> S                               | -0.5        | Taurocholic acid       | (*)↑                     | (*)↓                            | (*)↓                             | Primary bile acid biosynthesis<br>Bile secretion                    |
| 1.53 | 313.1062  | [M-H] <sup>-</sup>  | C <sub>14</sub> H <sub>14</sub> N <sub>6</sub> O <sub>3</sub>                   | 4.5         | Dihydropteroic acid    | (*)↑                     | (*)↓                            | (*)↓                             | Folate biosynthesis                                                 |
| 1.53 | 380.2557  | [M-H] <sup>-</sup>  | C <sub>18</sub> H <sub>40</sub> NO <sub>5</sub> P                               | -2.1        | Sphinganine-phosphate  | (*)↑                     | (*)↓                            | (*)↓                             | Sphingolipid metabolism                                             |
| 1.54 | 319.2262  | [M-H] <sup>-</sup>  | C <sub>20</sub> H <sub>32</sub> O <sub>3</sub>                                  | -3.1        | 8(R)-HETE              | (*)↑                     | (*)↓                            | (*)↓                             | Arachidonic acid metabolism                                         |
| 1.41 | 433.2249  | [M-H] <sup>-</sup>  | C <sub>17</sub> H <sub>34</sub> N <sub>6</sub> O <sub>5</sub> S                 | 3.9         | Glutathionylspermidine | (*)↑                     | (#)↓                            | (*)↓                             | Glutathione metabolism                                              |
| 1.56 | 327.2324  | [M-H] <sup>-</sup>  | C <sub>22</sub> H <sub>32</sub> O <sub>2</sub>                                  | 0.4         | Docosahexaenoic acid   | (*)↓                     | (*)↑                            | (*)↑                             | Biosynthesis of unsaturated fatty acids                             |
| 1.55 | 279.2320  | [M-H] <sup>-</sup>  | C <sub>18</sub> H <sub>32</sub> O <sub>2</sub>                                  | -0.9        | Linoleic acid          | (*)↑                     | (*)↓                            | (*)↓                             | Linoleic acid metabolism<br>Biosynthesis of unsaturated fatty acids |
| 1.20 | 151.0394  | [M+H] <sup>+</sup>  | C <sub>8</sub> H <sub>6</sub> O <sub>3</sub>                                    | -1.2        | Phenylglyoxylic acid   | (*)↑                     | (*)↓                            | (*)↓                             | Phenylalanine metabolism                                            |
| 1.16 | 175.1238  | [M+H] <sup>+</sup>  | C <sub>11</sub> H <sub>14</sub> N <sub>2</sub>                                  | 0.9         | N-Methyltryptamine     | (*)↓                     | (#)↓                            | (*)↑                             | Tryptophan metabolism                                               |
| 1.07 | 136.0767  | [M+H] <sup>+</sup>  | C <sub>8</sub> H <sub>9</sub> NO                                                | 3.0         | 2-Phenylacetamide      | (*)↑                     | (*)↓                            | (*)↓                             | Phenylalanine metabolism                                            |
| 1.14 | 154.0471  | [M+H] <sup>+</sup>  | C <sub>5</sub> H <sub>4</sub> N <sub>4</sub> O <sub>2</sub>                     | 3.2         | Xanthine               | (*)↑                     | (*)↓                            | (*)↓                             | Purine metabolism                                                   |
| 1.32 | 167.0938  | [M+H] <sup>+</sup>  | C <sub>9</sub> H <sub>11</sub> NO <sub>2</sub>                                  | -1.2        | Phenylalanine          | (*)↑                     | (*)↓                            | (*)↓                             | Phenylalanine metabolism                                            |
| 1.42 | 206.1063  | [M+H] <sup>+</sup>  | C <sub>11</sub> H <sub>12</sub> N <sub>2</sub> O <sub>2</sub>                   | 2.9         | L-Tryptophan           | (*)↓                     | (#)↑                            | (*)↑                             | Tryptophan metabolism                                               |
| 1.29 | 468.3088  | [M+H] <sup>+</sup>  | C <sub>22</sub> H <sub>46</sub> NO <sub>7</sub> P                               | -0.7        | LysoPC(14:0)           | (*)↑                     | (*)↓                            | (*)↓                             | Glycerophospholipid metabolism                                      |
| 1.24 | 516.3068  | [M+H] <sup>+</sup>  | C <sub>26</sub> H <sub>46</sub> NO <sub>7</sub> P                               | -4.5        | LysoPC(18:4)           | (*)↑                     | (*)↓                            | (*)↓                             | Glycerophospholipid metabolism                                      |
| 1.26 | 494.3247  | [M+H] <sup>+</sup>  | C <sub>24</sub> H <sub>48</sub> NO <sub>7</sub> P                               | 0.1         | LysoPC(16:1)           | (*)↑                     | (*)↓                            | (*)↓                             | Glycerophospholipid metabolism                                      |
| 1.29 | 570.3536  | [M+H] <sup>+</sup>  | C <sub>30</sub> H <sub>52</sub> NO <sub>7</sub> P                               | -4.1        | LysoPC(22:5)           | (*)↑                     | (*)↓                            | (*)↓                             | Glycerophospholipid metabolism                                      |

<sup>a</sup> compared to normal group. <sup>b</sup> compared to model group. Arrow (↑) indicates relative increase in signal. Arrow (↓) indicates relative decrease in signal. Asterik (\*) represents a statistically significant difference (P<0.05), while pound key (#) represents no statistically significant difference.

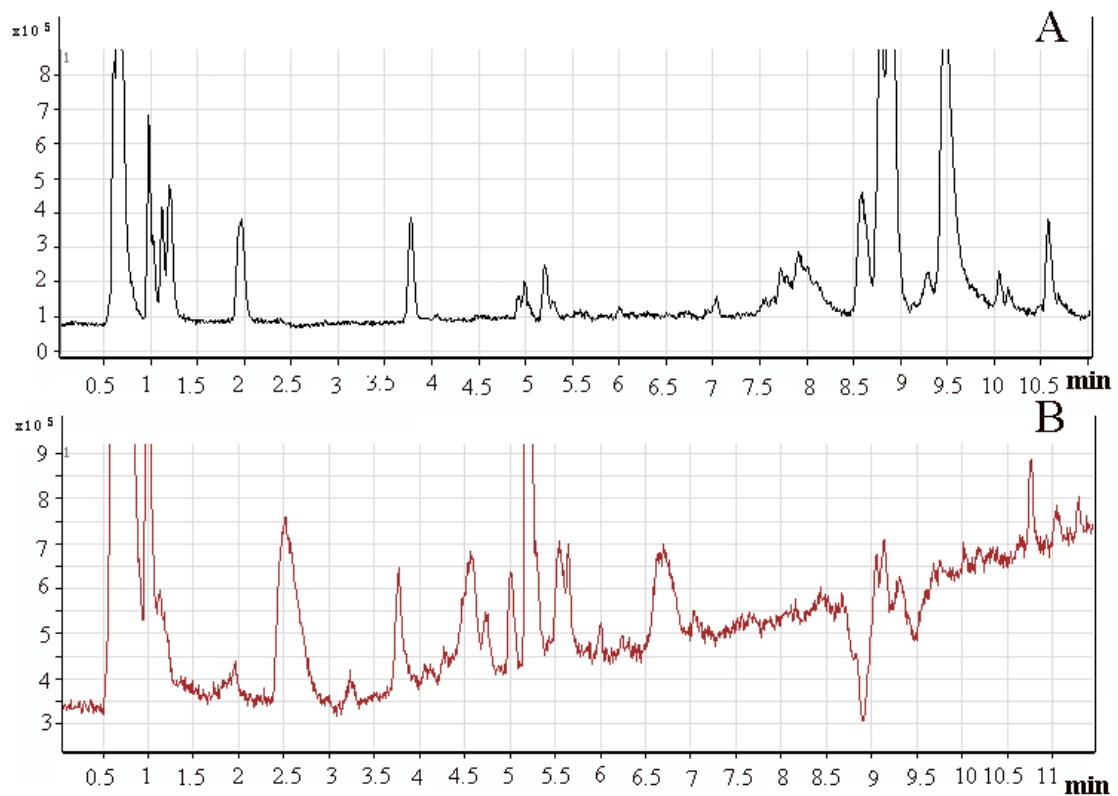

**Fig. S1. The magnification of typical total ion chromatograms (TIC) of normal mice in (A) ESI<sup>+</sup> mode and (B) ESI<sup>-</sup> mode during 0-11 min.**
